# Supplementary material for: Enhancing Gas Sensing Recyclability and Recovery Rate by Crystal Engineering of CuI Motif in MOFs
Source: Research Square preprint supplement (doi:10.21203/rs.3.rs-7155552/v1), 2025-07-29
Supplement: Supplementary file 1 [file 326cc160ebd21074d8ef6fd9.docx]

**Enhancing Gas Sensing Recyclability and Recovery Rate by Crystal Engineering of CuI Motif in MOFs**

Zi-Wei Li,#, 1 Bin Tan,#,2 Xiu-Ze Hei,3 Xing-Wu Liu,4 Ke Zhao,2 Chuan-Zhe Wang,1 Ke-Feng Li,1 Yong-Jun Chen,1 Xiao-Ying Huang,1 Kui Tan,5 Zhao-Feng Wu,*, 1 Jing Li,*, 6 and Gang Xu,*, 1

1State Key Laboratory of Structural Chemistry, Fujian Provincial Key Laboratory of Materials and Techniques toward Hydrogen Energy, Fujian Institute of Research on the Structure of Matter, the Chinese Academy of Sciences, Fuzhou, Fujian 350002, P. R. China

2School of Chemistry and Chemical Engineering, Beijing Institute of Technology, Beijing 102488, P. R. China

3Hoffmann Institute of Advanced Materials, Shenzhen Polytechnic University, 7098 Liuxian Blvd, Nanshan District, Shenzhen 518055, P. R. China

4Synfuels China Technology Co.Ltd., Leyuan Second South Street Yanqi Development Zone Huairou, Beijing, 101407, P. R. China

5Department of Chemistry, University of North Texas, Denton, Texas 76203, USA

6 Department of Chemistry and Chemical Biology, Rutgers University, 123 Bevier Rd. Piscataway, NJ 08854, USA

#These authors contributed equally to this work

*Corresponding author. Email: [zfwu@fjirsm.ac.cn](mailto:zfwu@fjirsm.ac.cn), jingli@chem.rutgers.edu, gxu@fjirsm.ac.cn.

**Contents**

[1. DFT calculations 3](#_Toc196732227)

[2. Crystal images, crystallographic data and PXRD patterns 4](#_Toc196732228)

[3. More structure details 7](#_Toc196732229)

[4. Physical characterizations 13](#_Toc196732230)

[5. Gas sensing properties 19](#_Toc196732231)

[6. References 23](#_Toc196732232)

# DFT calculations


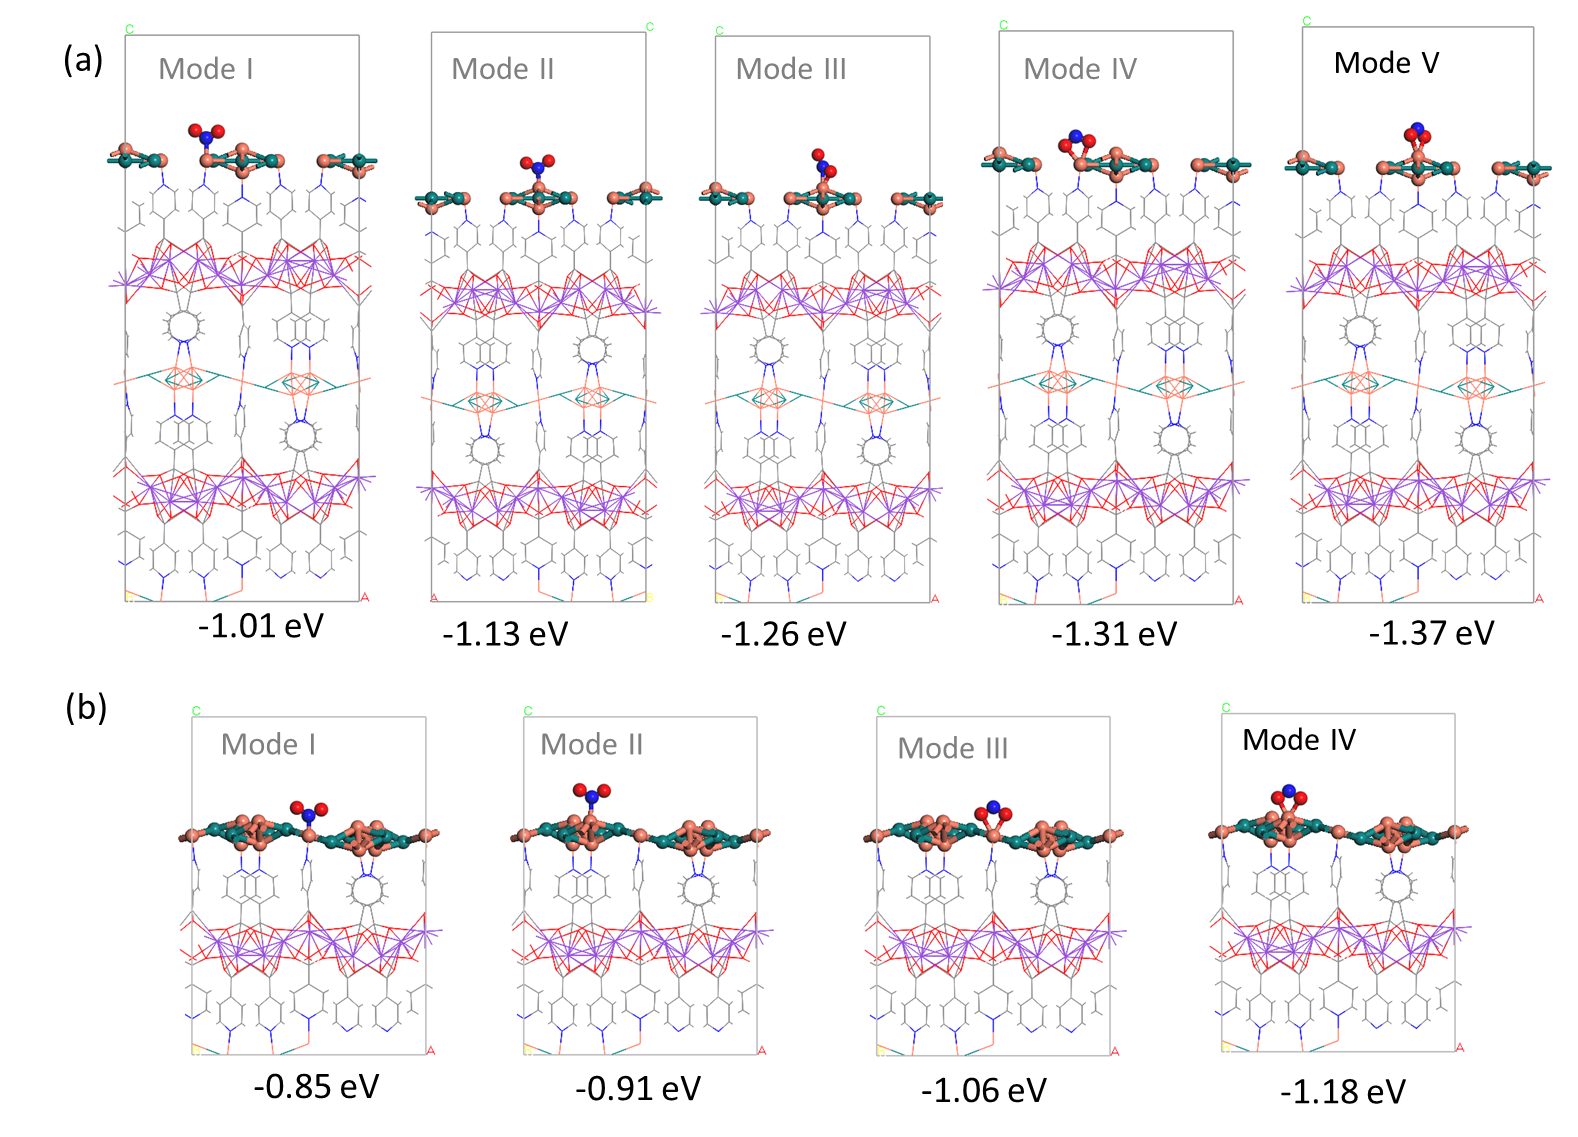


**Figure S1.** The NO2 adsorbing modes with the CuI atoms in the 1D {Cu4I3}n- chain (a) and 2D {Cu4I5}n- layer (b) of K-CuI-K-INA. Color scheme: red ball, O; blue ball, N; gray ball, C; lavender ball, K; light brown ball, Cu; teal ball, I.


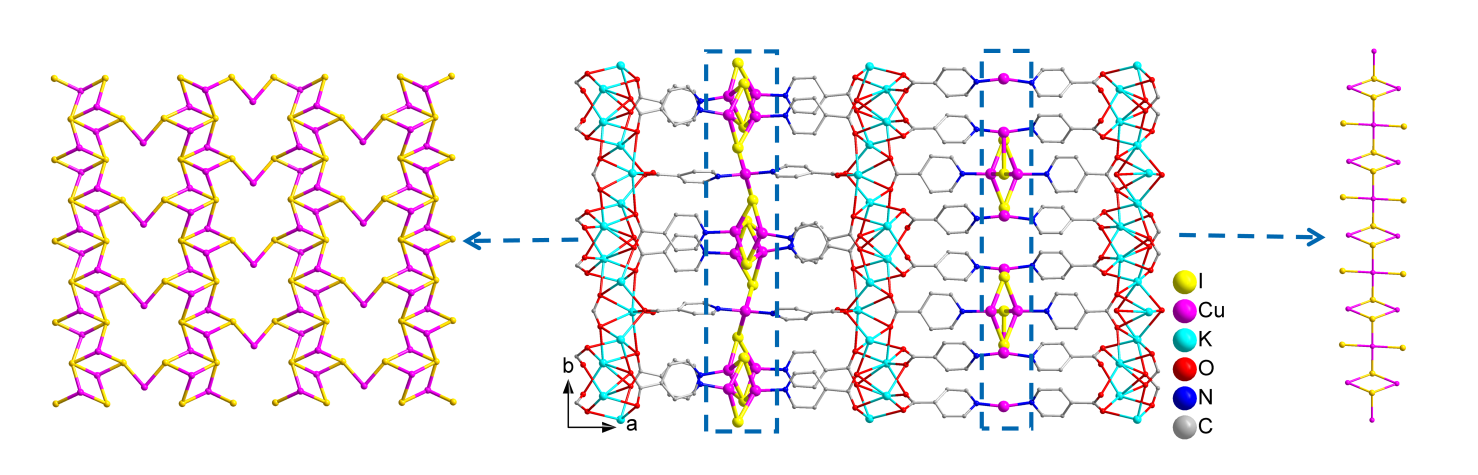


**Figure S2.** The 3D framework of K-CuI-K-INA with 1D {Cu4I3}n- chain and 2D {Cu4I5}n- layer in our former work.[1]

# Crystal images, crystallographic data and PXRD patterns


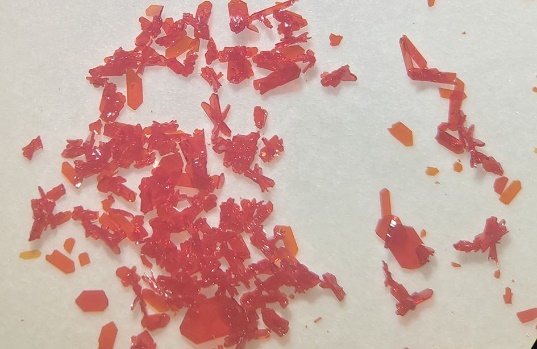


**Figure S3.** The photograph of the as-made single crystals of Na-CuI-K-INA.


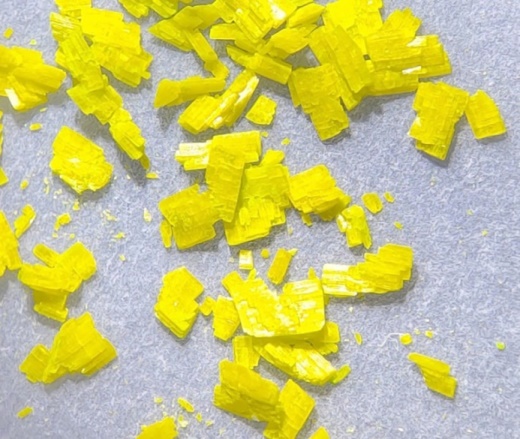


**Figure S4.** The photograph of the as-made single crystals of Cs-CuI-K-INA.


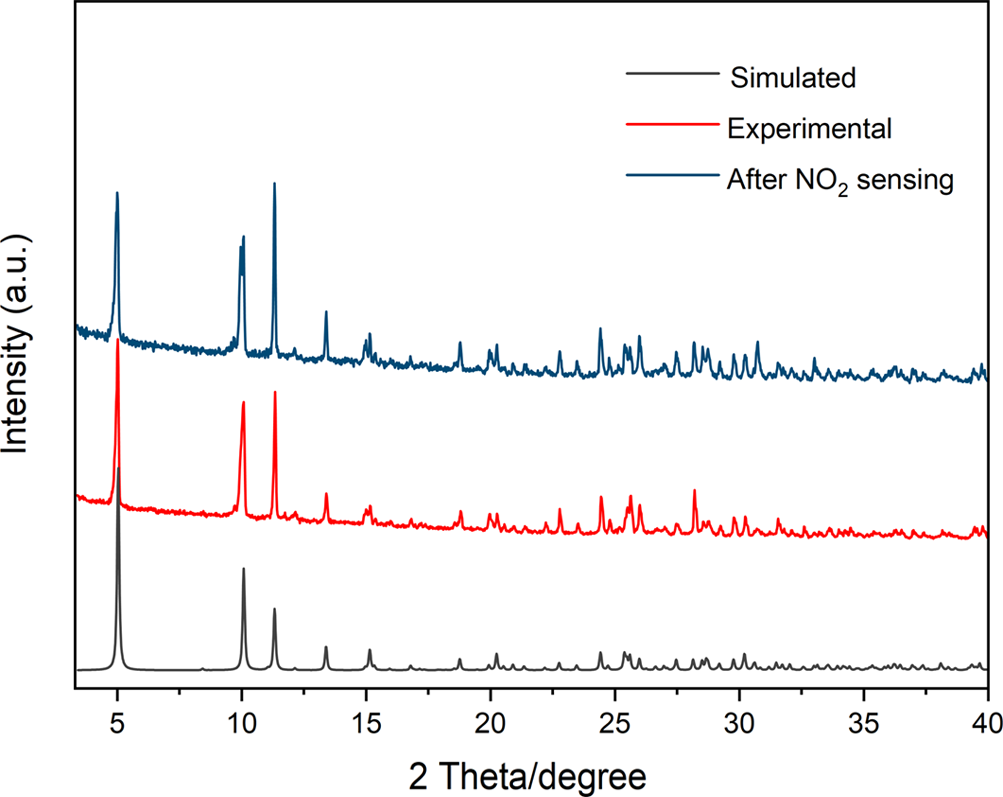


**Figure S5.** PXRD patterns of the as-made Na-CuI-K-INA and the sample after gas sensing. Simulated PXRD pattern is included for comparison.


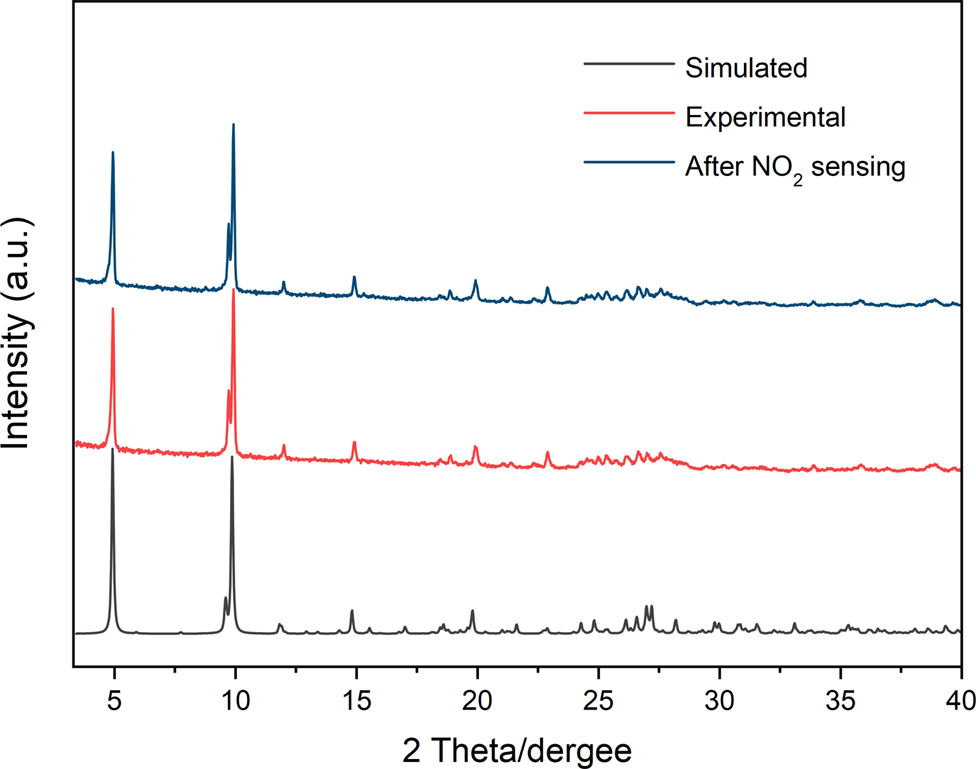


**Figure S6.** PXRD patterns of the as-made Cs-CuI-K-INA and the sample after gas sensing. Simulated PXRD pattern is included for comparison.

**
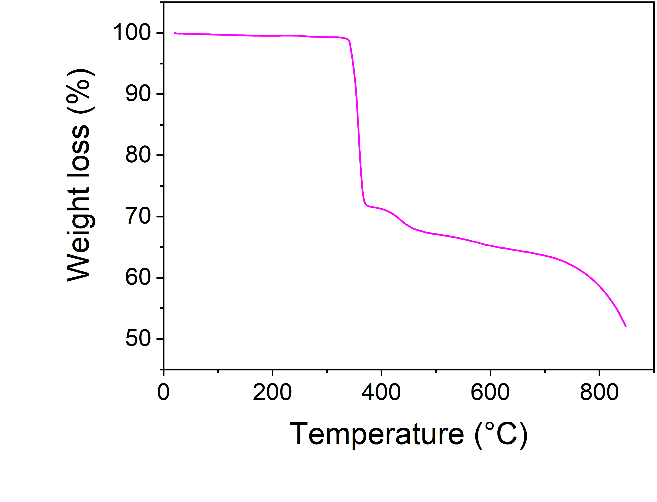
**

**Figure S7.** TG curve for Na-CuI-K-INA.

**

**

**Figure S8.** TG curve for Cs-CuI-K-INA.

**Table S1** Crystallographic data and structural refinement detail for the title compounds.

| Compounds | Na-CuI-K-INA | Cs-CuI-K-INA |
| --- | --- | --- |
| CCDC nos. | 2407515 | 2330128 |
| Empirical formula | C36H24Na2Cu4I3K3N6O12 | C36H24Cs1.25Cu5I4K3.75N6O12 |
| Formula weight | 1530.795 | 1870.67 |
| Crystal system | orthorhombic | monoclinic |
| Space group | *P*nma | *P*2/n |
| T/K | 295.15K | 293(2)K |
| *λ*/ Å | 0.71073 | 0.71073 |
| *a*/ Å | 11.7085(10) | 19.070(18) |
| *b*/ Å | 35.063(3) | 7.365(6) |
| *c*/ Å | 10.9815(12) | 37.02(3) |
| *α*/º | 90 | 90 |
| *β*/º | 90 | 104.457(12) |
| *γ*/º | 90 | 90 |
| *V*/ Å3 | 4508.4(8) | 5035(7) |
| *Z* | 4 | 4 |
| *Dc*/ Mg·m-3 | 2.255 | 2.468 |
| *μ*/mm-1 | 4.279 | 5.793 |
| *F*(000) | 2933.4 | 3500.0 |
| Measured refls. | 26931 | 24370 |
| Independent refls. | 5823 | 8661 |
| *R*int | 0.0553 | 0.1155 |
| No. of parameters | 307 | 627 |
| *GOF* | 1.024 | 1.072 |
| *aR*1, *bwR*2 [*I* > 2*σ*(*I*)] | 0.0417,0.0783 | 0.0924,0.2484 |
| *aR*1, *bwR*2 (all data) | 0.0787,0.0947 | 0.1105,0.2709 |

a*R*1 = ∑║*F*o│–│*F*c║/∑│*F*o│. b*wR*2 = [ ∑*w*(*F*o2*F*c2)2/∑*w*(*F*o2)2]1/2

# More structure details


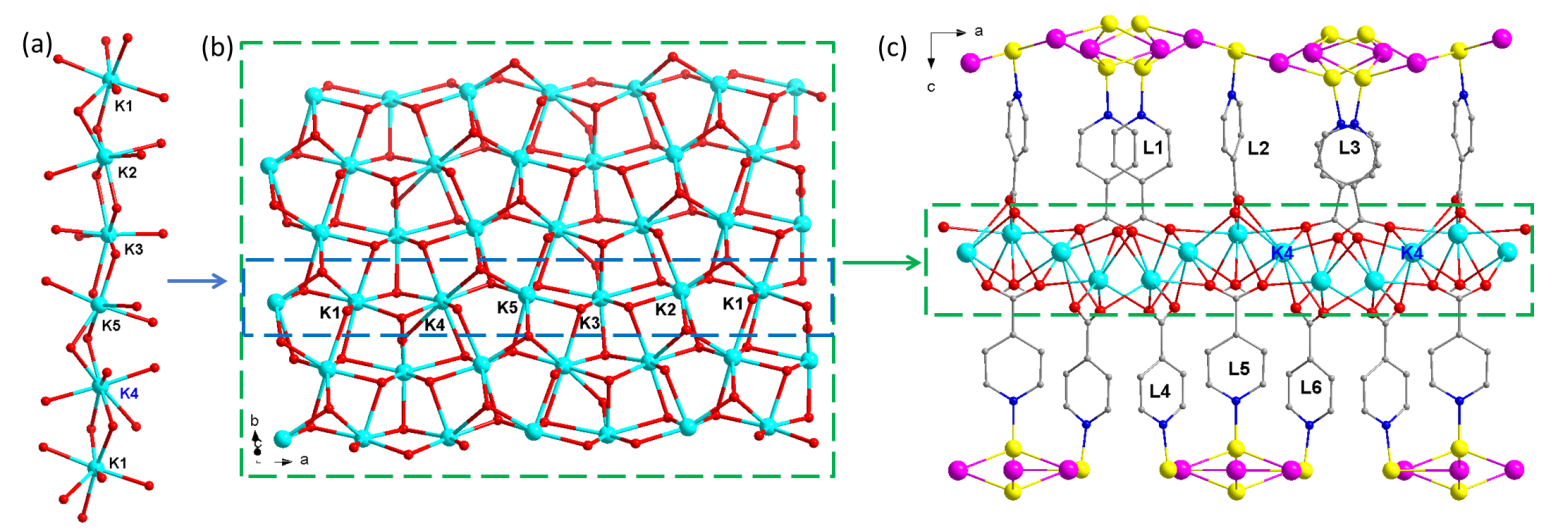


**Figure S9.** (a) The coordination modes for K+ in K-CuI-K-INA. (b) The 2D K-O layer. (c) The coordination sites for CuI created by coordination between K+ ions and INA- ligands. Color scheme: pink ball, O; blue ball, N; gray ball, C; turquoise ball, K; bright yellow ball, Cu; purple ball, I..


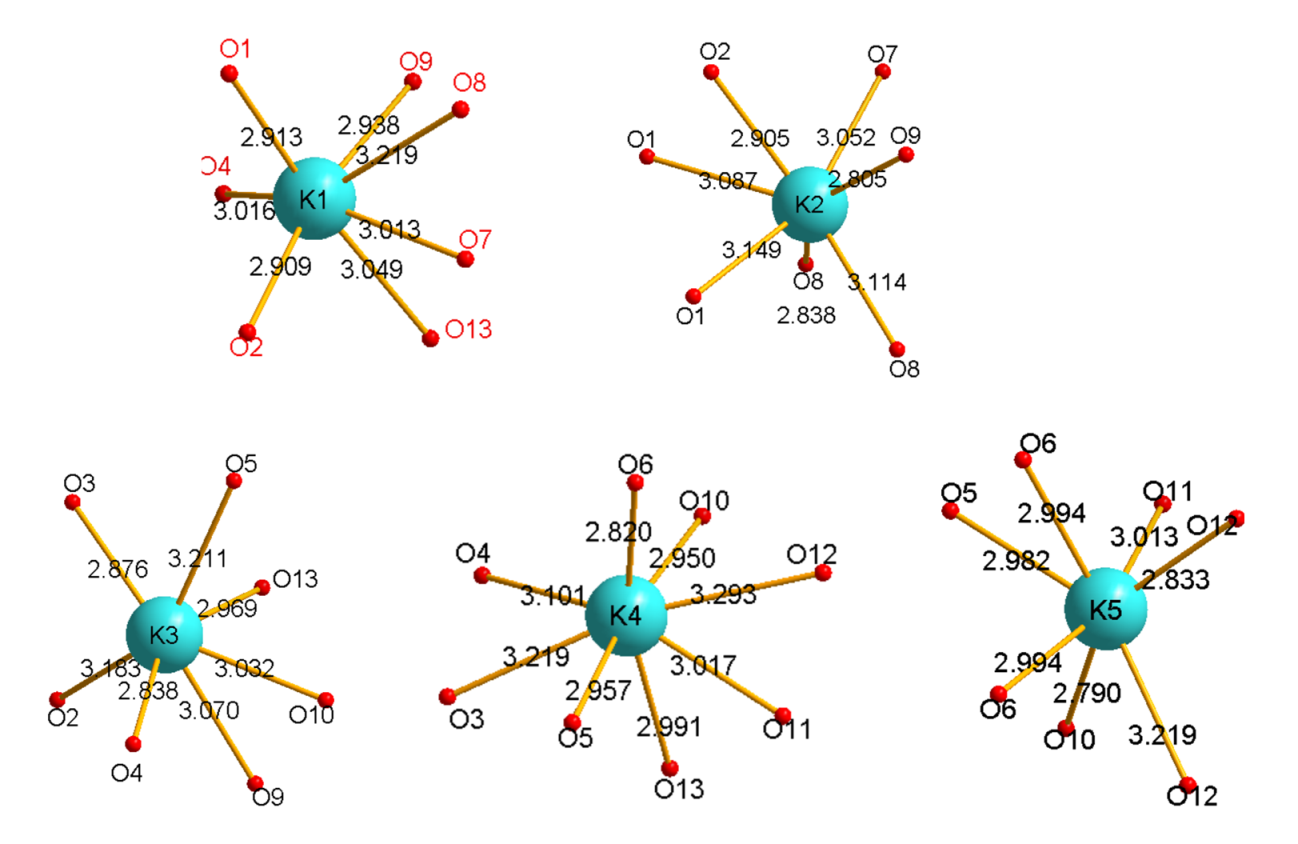


**Figure S10.** The coordination environments of K+ ions in K-CuI-K-INA with bond length values.


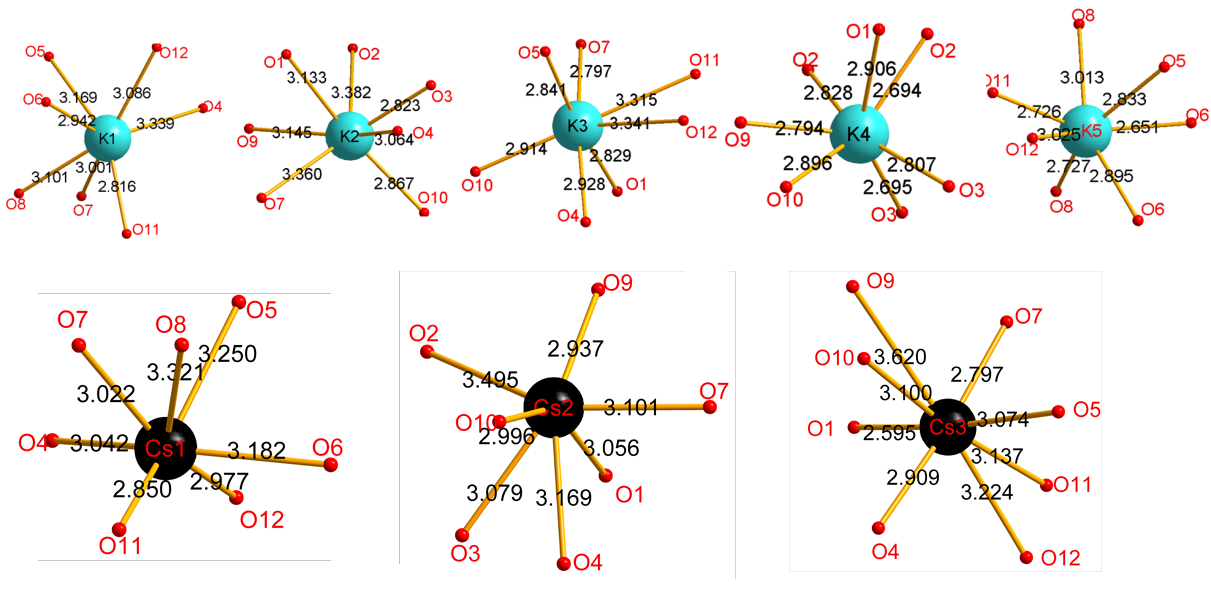


**Figure S11.** The coordination environments for K+ and Cs+ ions in Cs-CuI-K-INA with bond length values.


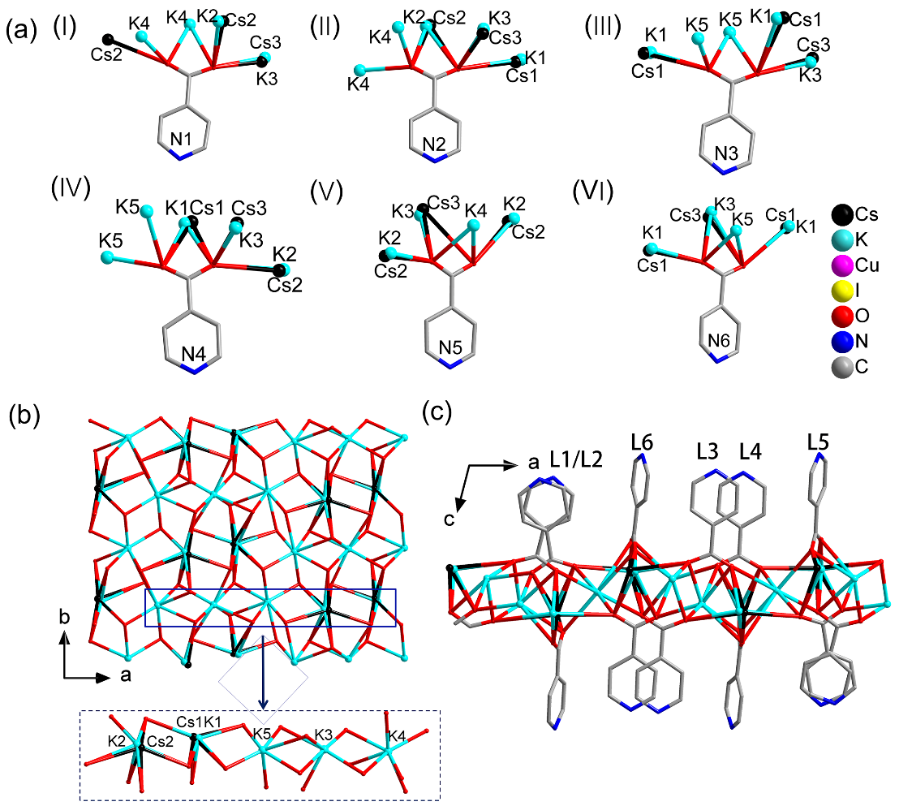


**Figure S12.** (a) The binding modes between the INA- ligand and metals in Cs-CuI-K-INA. (b) The 2D {K-Cs-O}*n* layer with a highlighting of coordination environments for K+ and Cs+ ions. (c) The coordination sites for CuI created by coordination between K+/Cs+ ions and pyridine from INA- ligands.


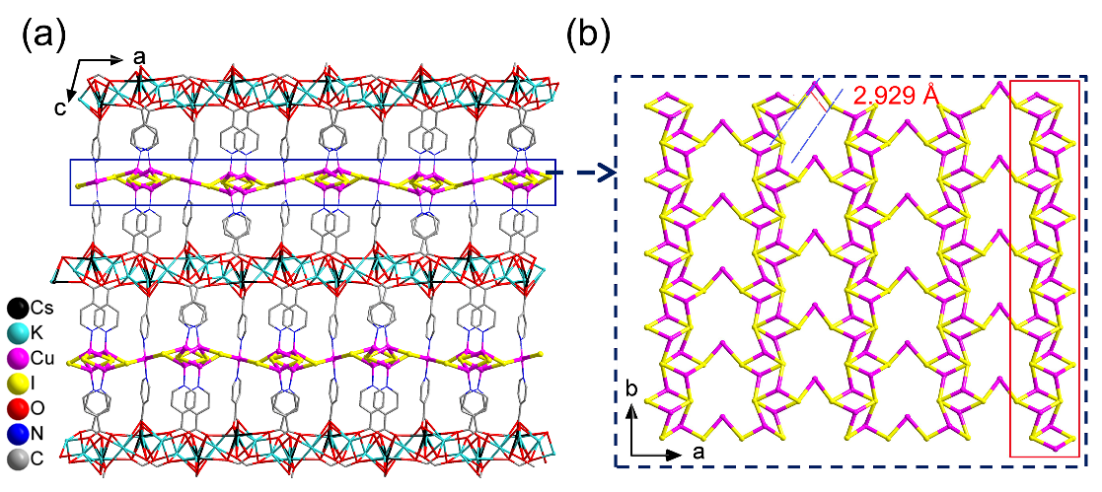


**Figure S13.** (a) The 3D framework of Cs-CuI-K-INA viewed along *b* axis. (b) The 2D {Cu4I5}*n*- layer in Cs-CuI-K-INA viewed along.

**Table S2** The selected K-O, Cs-O and Na-O bond lengths (Å) for these compounds.

| K-CuI-K-INA | | | | | | | |
| --- | --- | --- | --- | --- | --- | --- | --- |
| K(1)-O(1) | 2.912 | K(2)-O(2) | 2.905(6) | K(3)-O(9) | 3.070(6) | K(4)-0(12) | 3.293(6) |
| K(1)-O(2) | 2.910(7) | K(2)-O(7) | 3.052(7) | K(3)-O(10) | 3.032(6) | K(4)-0(12) | 2.991(7) |
| K(1)-O(4) | 3.016(7) | K(2)-O(8) | 2.838(6) | K(3)-O(13) | 2.969(7) | K(5)-O(5) | 2.982(6) |
| K(1)-O(7) | 3.013(7) | K(2)-O(8) | 3.114(7) | K(4)-0(3) | 3.218(6) | K(5)-O(6) | 2.994(7) |
| K(1)-O(8) | 3.219(6) | K(2)-O(9) | 2.805(6) | K(4)-0(4) | 3.101(7) | K(5)-O(10) | 2.790(6) |
| K(1)-O(9) | 2.937(6) | K(3)-O(2) | 3.184(7) | K(4)-0(5) | 2.958(7) | K(5)-O(11) | 3.013(7) |
| K(10-O(13) | 3.049(7) | K(3)-O(3) | 2.875(7) | K(4)-0(6) | 2.820(6) | K(5)-O(12) | 2.833(6) |
| K(2)-O(1) | 3.149(7) | K(3)-O(4) | 2.837(7) | K(4)-0(10) | 2.950(7) | K(5)-O(12) | 3.218(7) |
| K(2)-O(1) | 3.088(7) | K(3)-O(5) | 3.212(7) | K(4)-0(11) | 3.017(7) |  |  |

| Cs-CuI-K-INA | | | | | | | |
| --- | --- | --- | --- | --- | --- | --- | --- |
| Cs(1)-O(4) | 3.042 | Cs(2)-O(2) | 3.496 | Cs(3)-O(5) | 3.074 | K(1)-O(6) | 2.94 |
| Cs(1)-O(5) | 3.251 | Cs(2)-O(3) | 3.079 | Cs(3)-O(7) | 2.797 | K(1)-O(7) | 3.00 |
| Cs(1)-O(6) | 3.183 | Cs(2)-O(4) | 3.169 | Cs(3)-O(9) | 3.620 | K(1)-O(8) | 3.10 |
| Cs(1)-O(7) | 3.022 | Cs(2)-O(7) | 3.100 | Cs(3)-O(10) | 3.100 | K(1)-O(11) | 2.82 |
| Cs(1)-O(8) | 3.322 | Cs(2)-O(9) | 2.94 | Cs(3)-O(11) | 3.137 | K(1)-O(12) | 3.08 |
| Cs(1)-O(11) | 2.85 | Cs(2)-O(10) | 3.00 | Cs(3)-O(12) | 3.224 | K(1)-O(4) | 3.34 |
| Cs(1)-O(12) | 2.98 | Cs(2)-O(1) | 3.056 | Cs(3)-O(1) | 2.595 | K(1)-O(5) | 3.17 |
| Cs(1)-O(4) | 3.042 | Cs(2)-O(2) | 3.496 | Cs(3)-O(4) | 2.909 | K(2)-O(1) | 3.13 |
| Cs(1)-O(5) | 3.251 | Cs(3)-O(1) | 2.595 | K(1)-O(4) | 3.34 | K(2)-O(2) | 3.38 |
| Cs(2)-O(1) | 3.056 | Cs(3)-O(4) | 2.909 | K(1)-O(5) | 3.17 | K(2)-O(3) | 2.82 |
| K(2)-O(4) | 3.07 | K(3)-O(4) | 2.93 | K(4)-O(2) | 2.827 | K(5)-O(6) | 2.893 |
| K(2)-O(7) | 3.36 | K(3)-O(5) | 2.84 | K(4)-O(2) | 2.694 | K(5)-O(6) | 2.652 |
| K(2)-O(9) | 3.14 | K(3)-O(7) | 2.80 | K(4)-O(3) | 2.695 | K(5)-O(8) | 2.727 |
| K(2)-O(10) | 2.87 | K(3)-O(10) | 2.91 | K(4)-O(3) | 2.806 | K(5)-O(8) | 3.014 |
| K(2)-O(1) | 3.13 | K(3)-O(11) | 3.31 | K(4)-O(9) | 2.795 | K(5)-O(11) | 2.727 |
| K(2)-O(2) | 3.38 | K(3)-O(12) | 3.34 | K(4)-O(10) | 2.90 | K(5)-O(12) | 3.03 |
| K(3)-O(1) | 2.83 | K(4)-O(1) | 2.907 | K(5)-O(5) | 2.834 |  |  |
| Na-CuI-K-INA | | | | | | | |
| K(1)-O(2) | 2.880(4) | K(1)-O(6) | 2.837(4) | K(2)-O(4) | 2.764(3) | Na(1)#2-O(2) | 2.317(4) |
| K(1)-O(2) | 2.880(4) | K(2)-O(1) | 2.940(3) | K(2)-O(5) | 2.815(4) | Na(1)#3-O(3) | 2.380(3) |
| K(1)-O(3) | 2.704(3) | K(2)-O(2) | 3.068(4) | K(2)-O(6) | 2.871(4) | Na(1)#3-O(4) | 2.503(3) |
| K(1)-O(3) | 2.704(3) | K(2)-O(3) | 2.836(3) | Na(1)-O(1) | 2.261(4) | Na(1)#11-O(5) | 2.310(4) |
| K(1)-O(6) | 2.837(4) | K(2)-O(4) | 2.778(3) |  |  |  |  |
| Symmetry transformations used to generate equivalent atoms: #1 *x*, *y*, *z* #2 *x*+1/2, -*y*+1/2, -*z*+1/2 #3 -*x*, *y*+1/2, -*z* | | | | | | | |

**Table S3** The selected Cu-I bond lengths (Å) for for compounds K-CuI-K-INA, Cs-CuI-K-INA and Na-CuI-K-INA.

| K-CuI-K-INA | | | |
| --- | --- | --- | --- |
| Cu(1)-I(1) | 2.6657(16) | Cu(4)-I(3) | 2.6650(16) |
| Cu(2)-I(1) | 2.7905(17) | Cu(5)-I(4) | 2.8763(18) |
| Cu(2)-I(2) | 2.6931(16) | Cu(6)-I(4) | 2.6292(17) |
| Cu(3)-I(2) | 2.7387(18) | Cu(4)-I(5) | 2.7232(17) |
| Cu(3)-I(3) | 2.7012(18) | Cu(5)-I(5) | 2.6885(17) |
| Cs-CuI-K-INA | | | |
| Cu(1)-I(2)#9 | 2.880(4) | Cu(4)-I(1) | 2.630(3) |
| Cu(1)-I(2) | 2.880(4) | Cu(4)-I(3)#10 | 2.866(3) |
| Cu(2)-I(1) | 2.619(3) | Cu(4)-I(4) | 2.591(3) |
| Cu(2)-I(3) | 2.725(3) | Cu(5)-I(1) | 2.861(3) |
| Cu(2)-I(4) | 2.679(3) | Cu(5)-I(2) | 2.598(3) |
| Cu(3)-I(1) | 2.778(3) | Cu(5)-I(3) | 2.657(3) |
| Cu(3)-I(2)#10 | 2.679(3) | Cu(6)-I(4)#11 | 2.930(4) |
| Cu(3)-I(3)#10 | 2.633(3) | Cu(6)-I(4) | 2.930(4) |
| Symmetry transformations: #9 1/2-*x*, +*y*, 1/2-*z*; #10 +*x*, 1+*y*, +*z*; #11 3/2-*x*, +*y*, 1/2-*z* | | | |
| Na-CuI-K-INA | | | |
| Cu(2)-I(1) | 2.720(8) | Cu(2)#1-I(3) | 2.757(8) |
| Cu(2)#1-I(1) | 2.720(8) | Cu(2) -I(3) | 2.757(8) |
| Cu(1)-I(2) | 2.794(11) | Cu(3)-I(3) | 2.902(16) |
| Cu(2)#1-I(2) | 2.733(9) |  |  |
| Symmetry transformations: #1 +*x*, 1/2-*y*, +*z*; | | | |


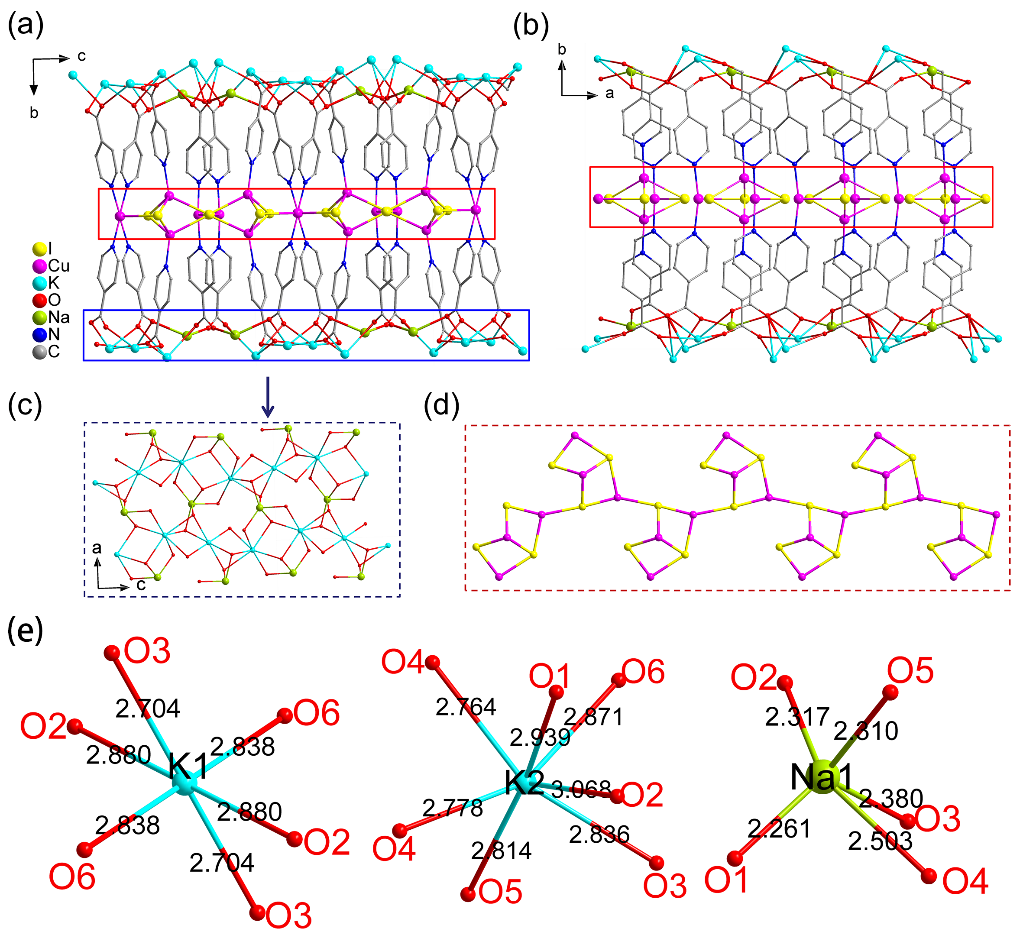


**Figure S14.** (a) and(b) are the 3D structure of Na-CuI-K-INA viewed along *a* and c axis direction, respectively. (c) The 2D {Na-K-O}*n* coordination layer. (d) The 1D β-{Cu4I3}*n*+ chain in Na-CuI-K-INA highlighted in red line. (e) The coordination environments for K+ and Na+ ions in Na-CuI-K-INA with bond length values.

# Physical characterizations

**
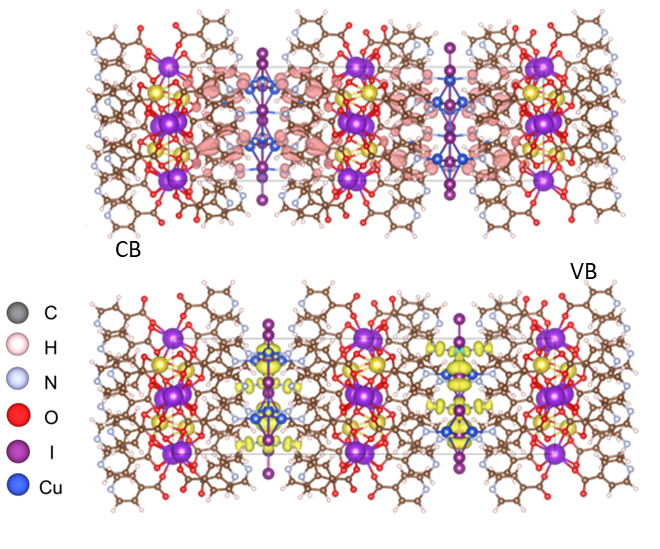
**

**Figure S15.** The plot of the highest occupied crystal orbital and lowest unoccupied crystal orbital of Na-CuI-K-INA**.**.

**
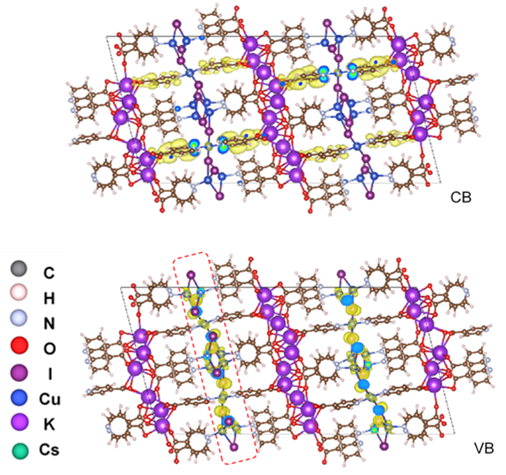
**

**Figure S16.** The plot of the highest occupied crystal orbital and lowest unoccupied crystal orbital of Cs-CuI-K-INA**.**

**
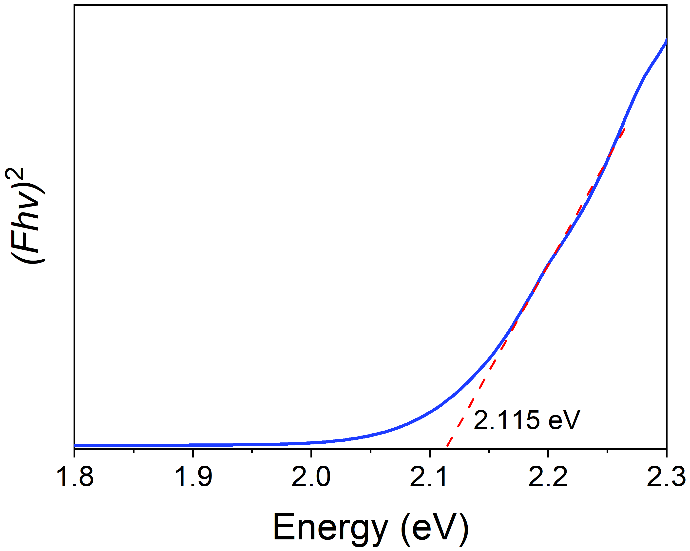
**

**Figure S17.** The UV-Vis optical absorption for Na-CuI-K-INA.

**
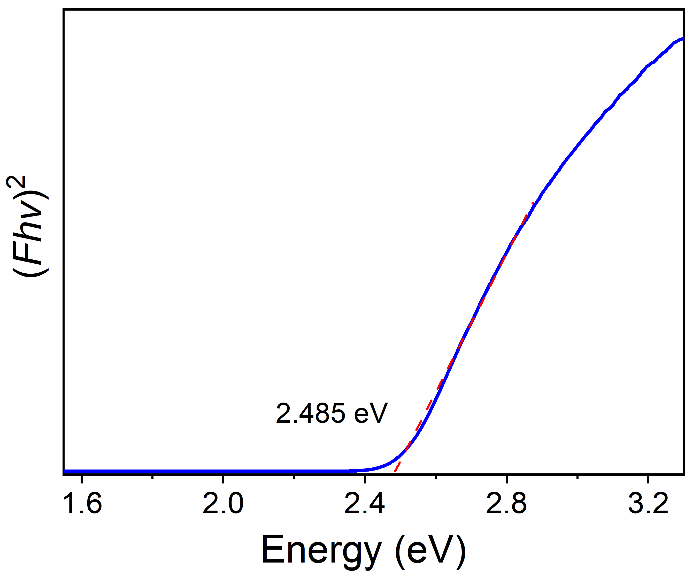
**

**Figure S18.** The UV-Vis optical absorption for Cs-CuI-K-INA.


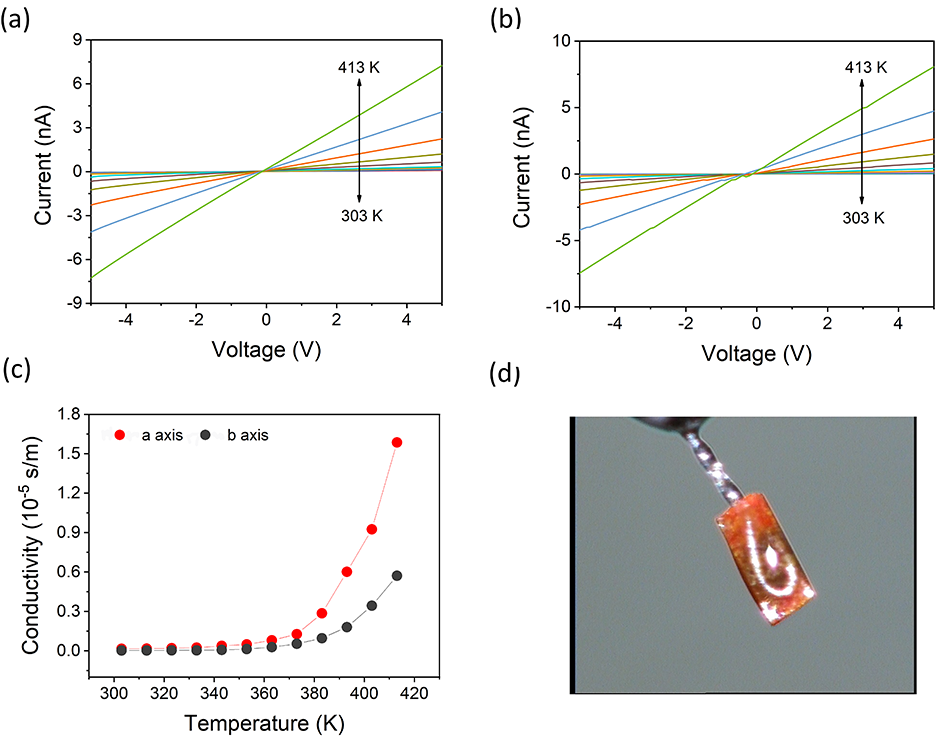


**Figure S19.** (a) and (b) are the temperature-dependent *I*–*V* curves for Na-CuI-K-INA measured along the long and short sides of the single crystal sample, respectively. (c)The temperature dependent conductivity for Na-CuI-K-INA measured along the long and short sides of the selected single crystal sample. (d) Photograph of the single crystal of Na-CuI-K-INA viewed along the long side of the single crystal sample.

**
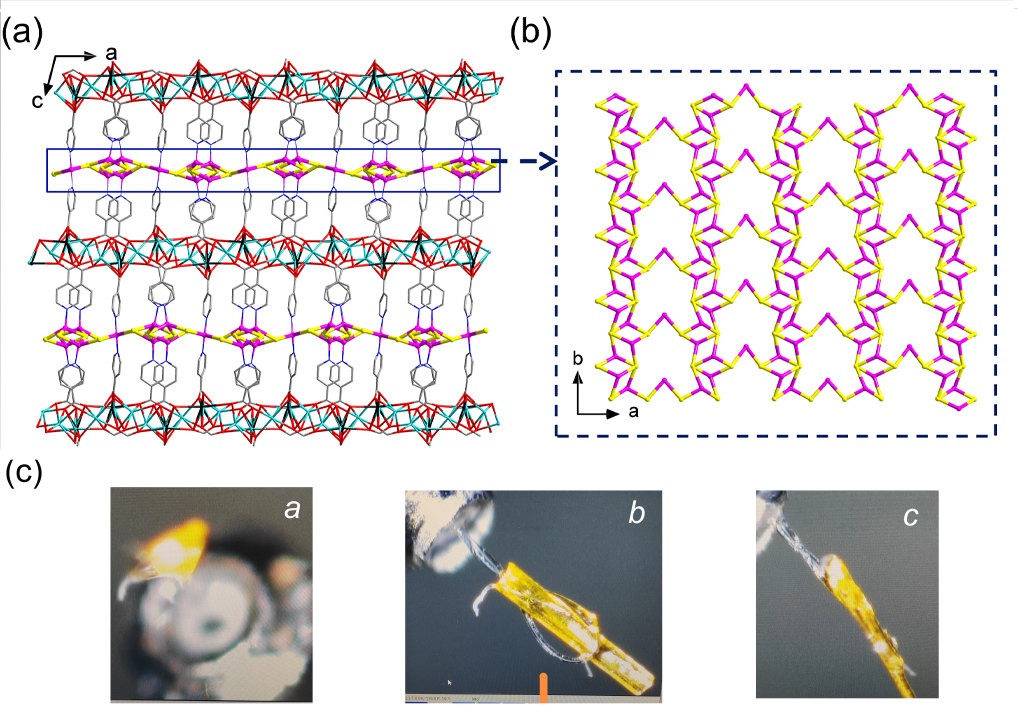
**

**Figure S20.** (a) The 3D framework of Cs-CuI-K-INA viewed along the *b* axis, respectively. (b) The 2D {Cu4I5}*n*- layer in Cs-CuI-K-INA viewed along *c* axis. (c) Photographs of the single crystal of Cs-CuI-K-INA viewed along *a* (the long side), *b* and *c* axis (the short side), respectively.

**
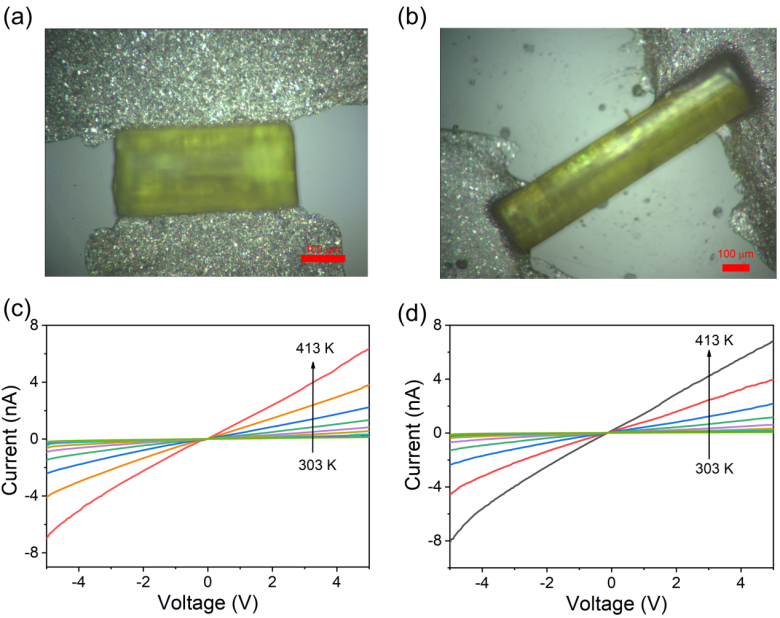

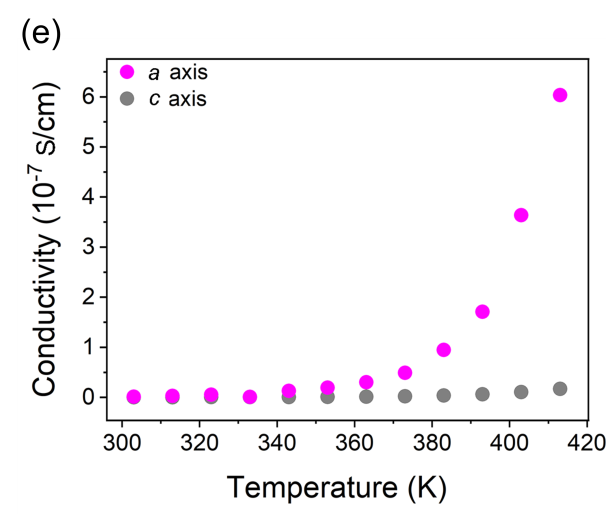
**

**Figure S21.** (a) and (b) are photographs of the single crystal sample for Cs-CuI-K-INA used for anisotropic conductivity study. Scale Bar: 100 μm. (c) and (d) are the temperature-dependent *I*–*V* curves for Cs-CuI-K-INA measured along the short and long sides of the single crystal sample, respectively. (e) The temperature dependent conductivity for Cs-CuI-K-INA measured along *a* and *c* axis of the single crystal.

**
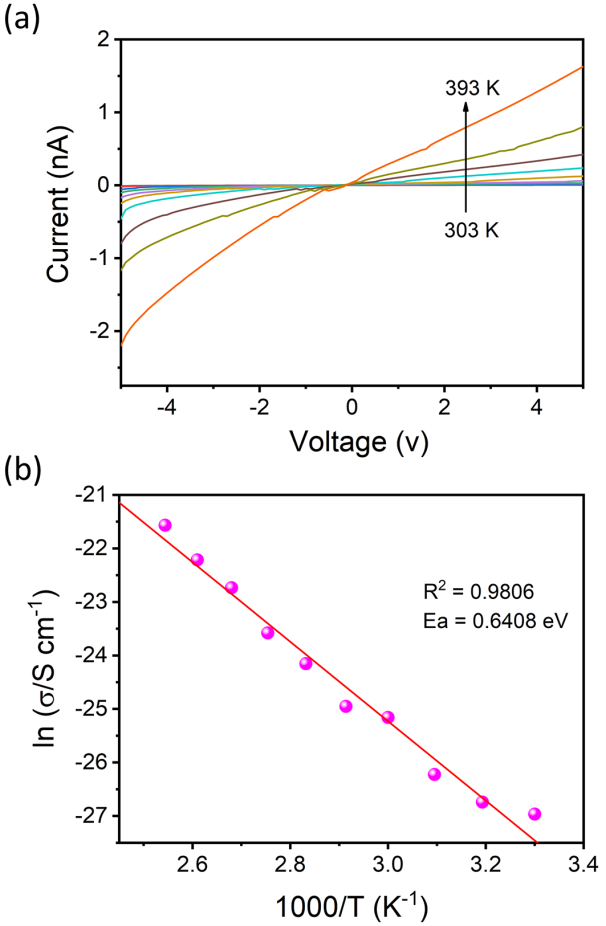
**

**Figure S22.** (a)The temperature-dependent *I*-*V* curves for Na-CuI-K-INA. (b) Arrhenius plot of Na-CuI-K-INA at different temperature.

**
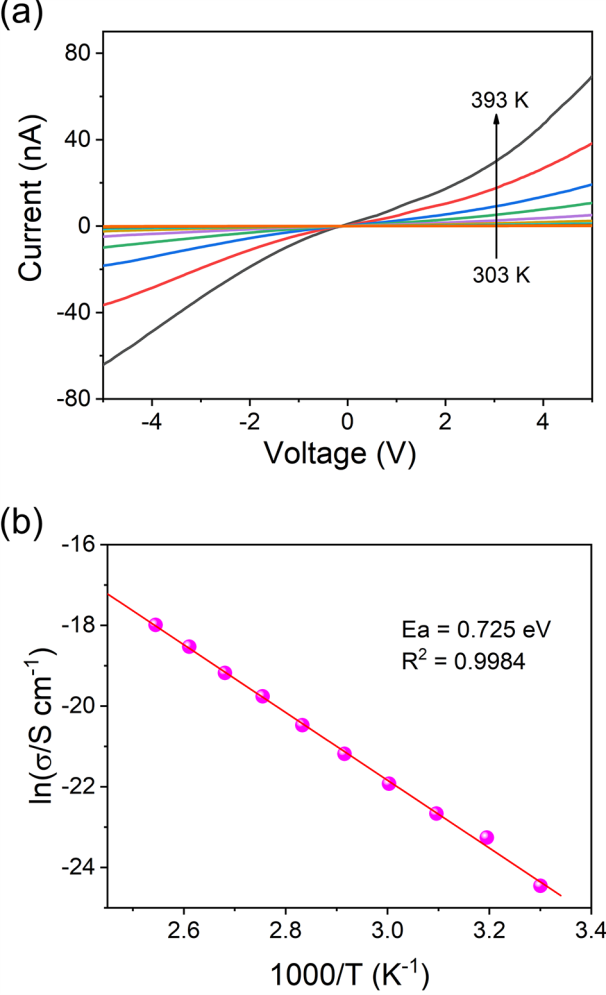
**

**
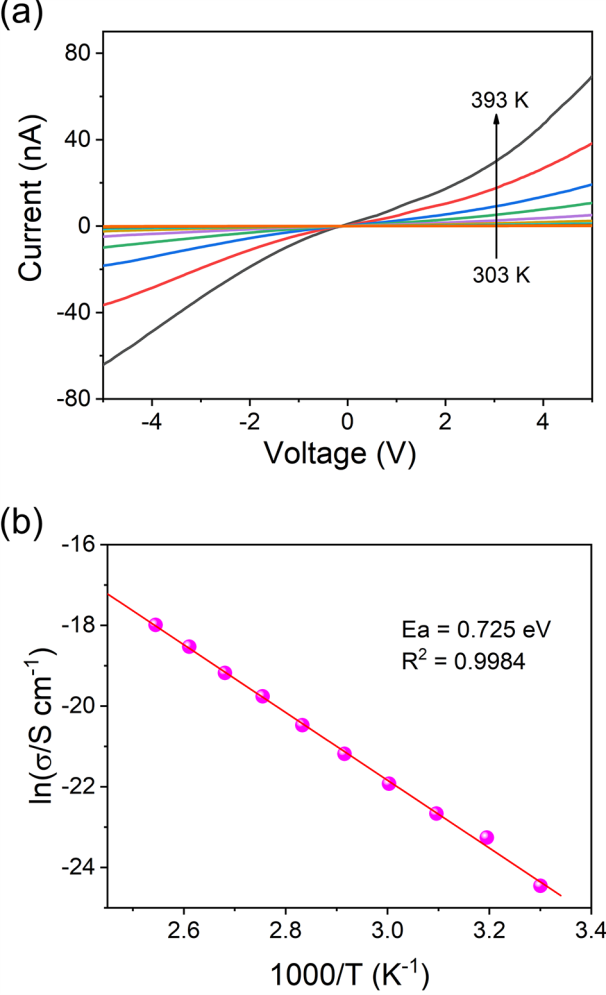
**

**Figure S23.** (a)The temperature-dependent *I*-*V* curves for Cs-CuI-K-INA. (b) Arrhenius plot of Cs-CuI-K-INA at different temperature.

**

**

**Figure S24.** The Mott-Schottky plots for Cs-CuI-K-INA.


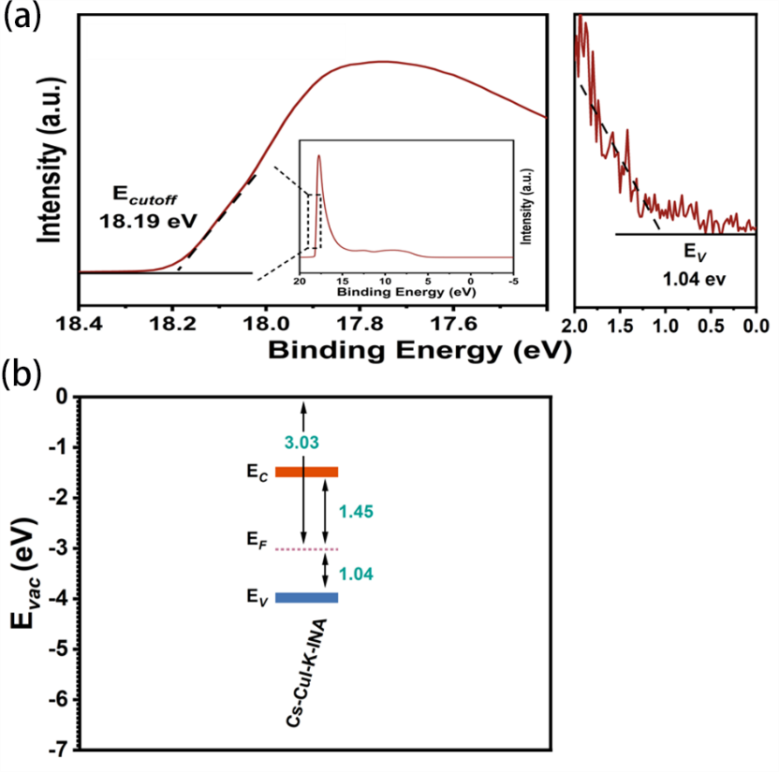


**Figure S25.** The UPS plots for the as-made Cs-CuI-K-INA.

# Gas sensing properties


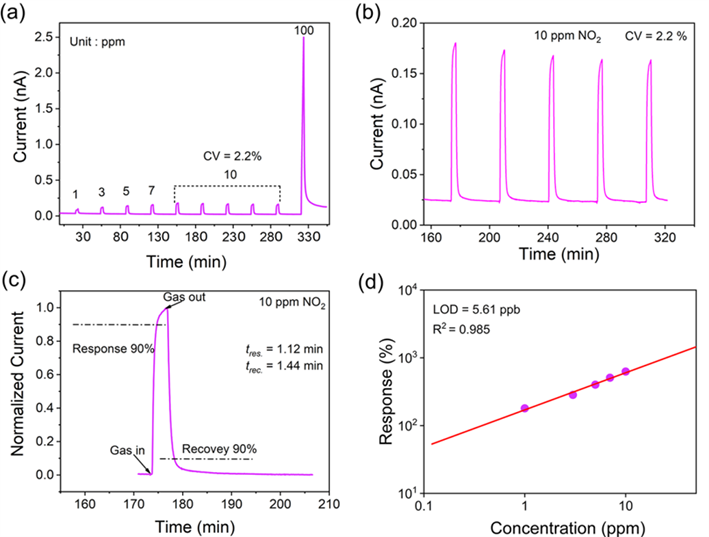


**Figure S26.** (a) Response and recovery curve for Cs-CuI-K-INA towards NO2 with different concentrations measuring at room temperature (RT). (b) Response and recovery curve towards 10 ppm NO2. (c) Response and recovery time towards 10 ppm NO2. (d) Log–log linear fitting of the response-concentration plot.


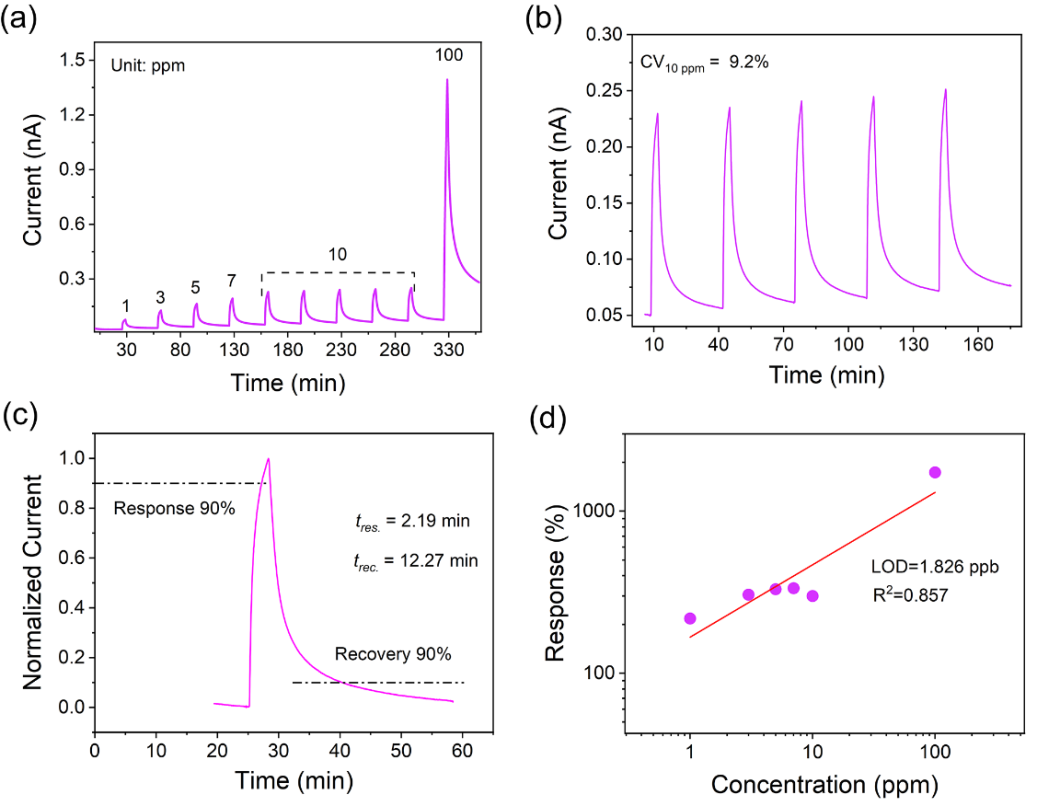


**Figure S27.** (a) Response and recovery curve for Na-CuI-K-INA towards NO2 with different concentrations at RT. (b) Response and recovery curve towards 10 ppm NO2. (c) Response and recovery time towards 10 ppm NO2. (d) Log–log linear fitting of the response-concentration plot.


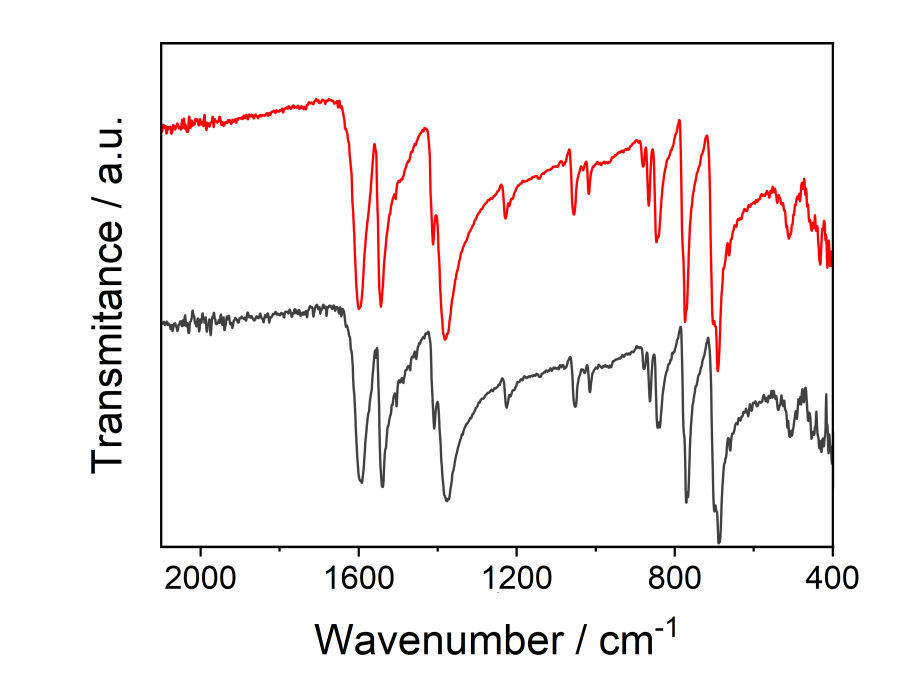


**Figure S28.** The IR spectra for the as-made Cs-CuI-K-INA (black) and the sample after NO2 sensing (red).


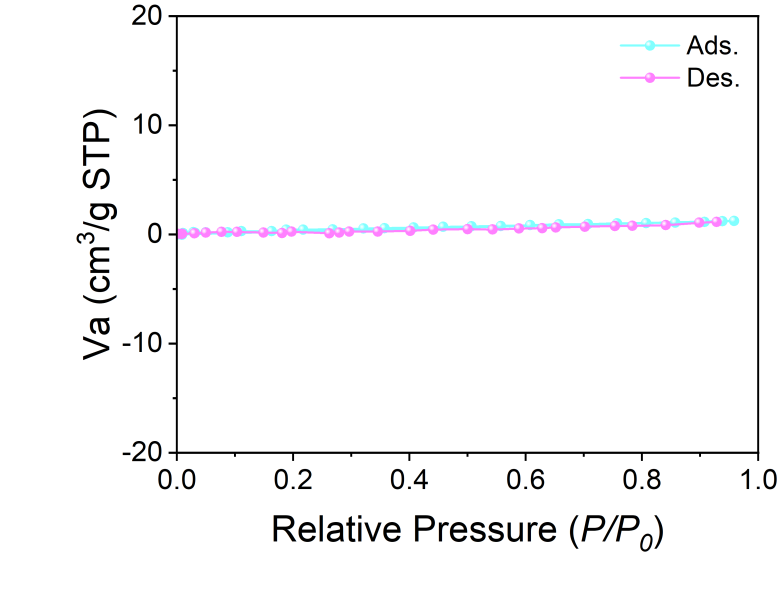


**Figure S29.** The N2 adsorption-desorption isotherms for Cs-CuI-K-INA.


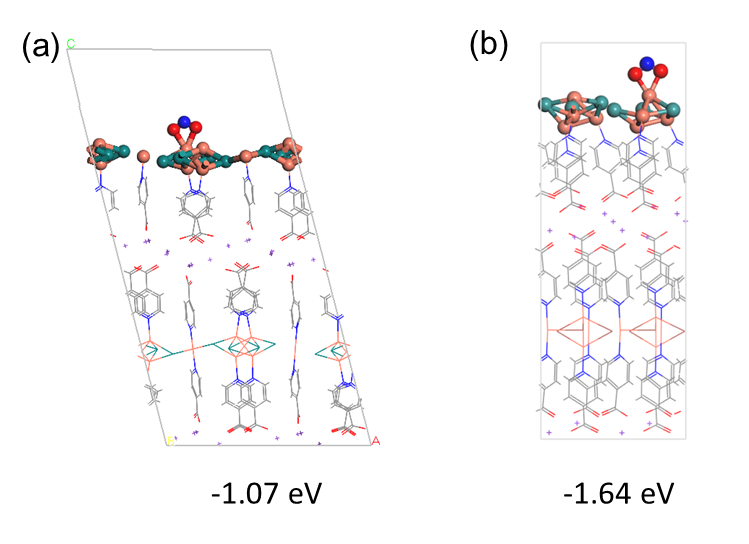


**Figure S30.** The DFT calculations for NO2 adsorbing energy with the Cu(I)atoms in a favorable bidentate O,O′-nitrito binding way. (a) NO2 adsorbed onto the Cu(I)atoms in 2D {Cu4I5}*n*- layer of Cs-CuI-K-INA. (b) NO2 adsorbed to the Cu(I)atoms from 1D β-{Cu4I3}*n*+ chain in Na-CuI-K-INA. Color scheme: red ball, O; blue ball, N; gray ball, C; light brown ball, Cu; teal ball, I.

**Table S4**. The summary of typical NO2-sensing performances of MOFs, metal oxide/sulfide and their complexes.

| Materials | Conc./ppm | Temperature/Light | Res./% | Res./Rec. time | LOD | Refs. |
| --- | --- | --- | --- | --- | --- | --- |
| K-Cs-CuI-INA | 10 | RT/no light | 649% | 67.2 s/86.4 sec. | 5.61 ppb | This work |
| K-CuI-K-INA | 10 | RT/visible light | 670.3% | 121.2/212.3 sec. | 1.12 ppb | 1 |
| CuI-K-INA-NO2 | 10 | RT/visible light | 191.6% | 123.6/312.5 sec. | 0.31 ppm |
| CuI-K-INA | 10 | RT/no light | 1434% | 121.8/ 312.6 sec. | 14.12 ppb |
| CuI-K-INA-NO2 | 10 | RT/no light | irreversible | 190.7/526.2 sec. | 44.47 ppb |
| Cu-Salphen-MOF | 100 | RT/no light | 766 | 2.25 min/-- | 0.28 ppm | 2 |
| MIL-101(Cr)•PEDOT | 1/10 | RT/no light | ~4/46 | 0.5-2.5 min/irreversible | 0.06 ppm | 3 |
| ZIF-8/Au NW | 1/10 | RT/no light | ~4/46 | 0.12/~11.5 min | 0.19 ppm | 4 |
| [Ni(TPyP)(TiF6)]n/PDVT-10 | 0.025–50 | RT/no light | -- | 0.72/7.3 min | 0.008 ppm | 5 |
| ZnCo-ZIF/GN-120 | 100 | RT/no light | 54.61 | 1.07/12 sec | 10 ppb |
| Cu3(HHTP)2-NFs | 5 | RT/blue light | 68.9 | 30 min/-- | -- | 6 |
| Fe2O3-Cu3(HHTP)2-NFs | 5 | RT/blue light | 63.5 | 30 min/-- | 11 ppb |
| Fe2Mn PCN-250 | 0.5 | RT/no light | 2.7 | 1325/5184 sec. | -- | 7 |
| Pt@Cu3(HHTP)2 | 1 | RT/no light | 12.1 | 14/-- min | 1 ppm | 8 |
| Pd@Cu3(HHTP)2 | 1 | RT/no light | 13.5 | 13.8/-- min | 1 ppm |
| SnO2/NRGO | 5 | RT/no light | 1.38 | 45/168 sec. | -- | 9 |
| RGO-polythiophene | 10 | RT/no light | 26.36 | <180/<200 sec. | 0.52 ppm | 10 |
| MoS2 | 100 | RT/no light | 27.92 | 29/350 sec. | -- | 11 |
| RGO/poly(3,4-ethylenedioxythiophene) | 1 | RT/no light | 0.05 | <180/<70 sec. | -- | 12 |
| Mixed p-Type MoS2 | 10 | RT/no light | 21.78 | 6.09/146.49 sec. | -- | 13 |
| PS/WO3–Pd60 | 2 | RT/no light | 5.2 | 10/339 sec. | 0.25 ppm | 14 |
| NiO | 3 | RT/no light | 4991 | 30 min/45 min | 200 ppb | 15 |
| PCDTBT | 10 | RT/no light | 160 | 6.5/33 min | 1 ppm | 16 |
| ZnO/poly(3-hexylthiophene) | 4 | RT/no light | 59 | <15/<45 min | -- | 17 |
| ZIF-67 derived WS2 functionalized carbons | 5 | RT/no light | ~48.2 | ~7/˃10 min | 0.1 ppm | 18 |
| PdO-Co3O4-SWCNTs-700 | 20 | RT/no light | ~27.3 | ~1.5 min/irreversible | 1 ppm | 19 |
| Pt@Cu3(HHTP)2 thin film | 3 | 150°C /no light | 89.9 | 8.2 min/-- | 0.1 ppm | 20 |
| Cu3(HHTP)2 thin film | 3 | 150°C /no light | 53.7 | 14 min/-- | 0.1 ppm |
| Cu3(HHTP)2 power | 3 | 150°C /no light | 11.8 | 17.3 min/-- | 1 ppm |
| Cu3(HHTP)2 nanoflakes | 5 | RT/no light | 79.8 | ~30/irreversible | -- |
| RT/blue light | 68.9 | ~30/irreversible | -- |
| Fe2O3–Cu3(HHTP)2 | 5 | RT/blue light | ~62 | ~30/>60 min | 0.2 ppm |
| ZIF-67 derived carbon composite-loaded MWCNTs | 5 | RT/no light | 1 | ～3/>3 min | 0.1 ppm | 21 |
| Mg-MOFs-I and II | 1 | 200°C /no light | 106/112 | I 2.07/3.68 min  II 3.07/2.83 min | -- | 22 |
| Ni-MOF-74 | 5 | 50°C /no light | -- | -- | <0.5 ppm | 23 |
| ZIF-8 | 100 | 350°C /no light | 11850 | 1.89/1.86 min | -- | 24 |
| Cu-MOF250 | 0.14 | 40°C /no light | 105 | --/>2 min | -- | 25 |
| Pd-SnO2/rGO | 100 | RT/no light | 792 | 0.95/0.37 min | 37.8 ppb | 26 |
| SV-MoS2/ZnO | 0.2 | RT/visible light | 226 | 75/111 sec. | 0.1 ppb | 27 |
| SnS2/rGO | 0.01 | RT/visible light | 586 | 1.5/0.54 min | 0.15 ppb | 28 |
| SnS2 | 5 | RT/visible light | 34 | 300/-- sec. | 2.5 ppb | 29 |
| ZnO/PbS | 1 | RT/visible light | 118–122 | 3/4 min | 26 ppb | 30 |
| ZnO/*g*-C3N4 | 7 | RT/visible light | 4480 | 142/190 sec. | 38 ppb | 31 |
| SnS2 | 8 | RT/visible light | 1080 | 164/236 sec. | 38 ppb | 32 |
| Au-WS2 | 0.25 | RT/visible light | 20 | -- | 250 ppb | 33 |
| WS2-rGO | 1 | RT/visible light | 127 | 16/18 min | 400 ppb | 34 |
| ZnO-Ag nanoparticles | 5 | RT/visible light | 154.5 | 150/50 sec. | < 500 ppb | 35 |
| WO3@rGO | 0.9 | RT/visible light | 63.73 | 18.6/23.3 min | -- | 36 |
| WO3 | 0.16 | RT/visible light | 400 | 20/42.5 min | -- | 37 |
| 0.4 | RT/visible light | 9200 | 51/60 min | -- | 38 |
| FIR-120 | 1 | RT/visible light | 116 | 2.48/2.60 min | 0.04 ppm | 39 |
| MnPS3 | 35 | RT/no light | 9530% | 96/220 sec. | 50ppb | 40 |
| HIOTP-Ni | 10 | RT/no light | 405% | 1.69/10.32 min | 0.21 ppm | 41 |
| Ag(SPh-NH2) | 10 | RT/no light | 852.6% | 1.0/2.3 min | 0.9 ppb | 42 |
| PbS CQDs | 50 | RT/no light | 21.7 | 12/37 sec. | 84ppb | 43 |
| PbCdSe QD gels | -- | RT/no light | 0.06%/ppb | 28/60 sec. | 3ppb | 44 |
| PbBDT OIHSL nanosheets | 0.04 | RT/no light | 5.512 | 16.2/47.4 sec. | 0.51ppb | 45 |
| PbSe QD gel | 1.32 | RT/no light | 98% | 35/279 sec. | 3 ppb | 46 |
| 1.32 | RT/Violet light | 50% | 27/102 sec. | -- |

Note: -- is no mentioned, RT = room temperature, sec. = seconds, min. = minutes.

# References

1. Wu, Z.F. et al. Confinement of 1D Chain and 2D Layered CuI Modules in K-INA-R Frameworks via Coordination Assembly: Structure Regulation and Semiconductivity Tuning. *J. Am. Chem. Soc.* **145**, 19293-19302 (2023).

2. Su, X. et al. Facile Synthesis of Metallosalphen-Based 2D Conductive Metal-Organic Frameworks for NO2 Sensing: Metal Coordination Induced Planarization. *Angew. Chem. Int. Ed.* **62**, e202302645 (2023).

3. Le Ouay, B. et al. Nanostructuration of PEDOT in Porous Coordination Polymers for Tunable Porosity and Conductivity. *J. Am. Chem. Soc.* **138**, 10088-10091 (2016).

4. Li, P.P. et al. Sequential Ligand Exchange of Coordination Polymers Hybridized with In Situ Grown and Aligned Au Nanowires for Rapid and Selective Gas Sensing. *ACS Appl. Mater. Interfaces* **11**, 13624-13631 (2019).

5. He, L., Zhang, W.Y., Wu, H.Y. & Zhao, Y. Zn-Co Zeolitic Imidazolate Framework Nanoparticles Intercalated in Graphene Nanosheets for Room-Temperature NO2 Sensing. *ACS Appl. Nano Mater.* **4**, 3998-4006 (2021).

6. Jo, Y.M. et al. Visible-Light-Activated Type II Heterojunction in Cu-3(hexahydroxytriphenylene)(2)/Fe2O3 Hybrids for Reversible NO2 Sensing: Critical Role of π-π * Transition. *ACS Cent. Sci.* **7**, 1176-1182 (2021).

7. Khan, M.W. et al. Hetero-metallic metal-organic frameworks for room-temperature NO2 sensing. *J. Colloid Interface Sci.* **610**, 304-312 (2022).

8. Koo, W.T., Kim, S.J., Jang, J.S., Kim, D.H. & Kim, I.D. Catalytic Metal Nanoparticles Embedded in Conductive Metal-Organic Frameworks for Chemiresistors: Highly Active and Conductive Porous Materials. *Adv. Sci.* **6,** 1900250 (2019).

9. Wang, Z.Y. et al. High-performance reduced graphene oxide-based room-temperature NO2 sensors: A combined surface modification of SnO2 nanoparticles and nitrogen doping approach. *Sens. Actuators B Chem.* **242**, 269-279 (2017).

10. Bai, S.L. et al. Enhancement of NO2-Sensing Performance at Room Temperature by Graphene-Modified Polythiophene. *Ind. Eng. Chem. Res.* **55**, 5788-5794 (2016).

11. Kumar, R., Goel, N. & Kumar, M. UV-Activated MoS2 Based Fast and Reversible NO2 Sensor at Room Temperature. *ACS Sens.* **2**, 1744-1752 (2017).

12. Yang, Y.J. et al. In Situ Polymerization Deposition of Porous Conducting Polymer on Reduced Graphene Oxide for Gas Sensor. *ACS Appl. Mater. Interfaces* **6**, 13807-13814 (2014).

13. Agrawal, A.V. et al. Photoactivated Mixed In-Plane and Edge-Enriched p-Type MoS2 Flake-Based NO2 Sensor Working at Room Temperature. *ACS Sens.* **3**, 998-1004 (2018).

14. Qiang, X.Y. et al. Effect of the Functionalization of Porous Silicon/WO3 Nanorods with Pd Nanoparticles and Their Enhanced NO2-Sensing Performance at Room Temperature. *Materials* **11**, 764 (2018).

15. Benedict, S., Singh, M., Naik, T.R.R., Shivashankar, S.A. & Bhat, N. Microwave-Synthesized NiO as a Highly Sensitive and Selective Room-Temperature NO2 Sensor. *ECS J Solid State Sci Technol* **7**, Q3143-Q3147 (2018).

16. Kumar, A. et al. Modeling of gate bias controlled NO2 response of the PCDTBT based organic field effect transistor. *Chem. Phys. Lett.* **698**, 7-10 (2018).

17. Wang, J. et al. Hierarchical ZnO Nanosheet-Nanorod Architectures for Fabrication of Poly(3-hexylthiophene)/ZnO Hybrid NO2 Sensor. *ACS Appl. Mater. Interfaces***8**, 8600-8607 (2016).

18. Koo, W.T. et al. Few-Layered WS2 Nanoplates Confined in Co, N-Doped Hollow Carbon Nanocages: Abundant WS2 Edges for Highly Sensitive Gas Sensors. *Adv. Funct. Mater.* **28**, 1802575 (2018).

19. Choi, S.J. et al. Metal-Organic Framework-Templated PdO-Co3O4 Nanocubes Functionalized by SWCNTs: Improved NO2 Reaction Kinetics on Flexible Heating Film. *ACS Appl. Mater. Interfaces* **9**, 40593-40603 (2017).

20. Kim, J.O. et al. Large-area synthesis of nanoscopic catalyst-decorated conductive MOF film using microfluidic-based solution shearing. *Nat. Commun.* **12**, 4294 (2021).

21. Rui, K. et al. Dual-Function Metal-Organic Framework-Based Wearable Fibers for Gas Probing and Energy Storage. *ACS Appl. Mater. Interfaces* **10**, 2837-2842 (2018).

22. Lee, J.H. et al. Gas Sensing Properties of Mg-Incorporated Metal-Organic Frameworks. *Sensors* **19**, 3323 (2019).

23. Small, L.J. et al. Near-Zero Power MOF-Based Sensors for NO2 Detection. *Adv. Funct. Mater.* **30,** 2003598 (2020).

24. Zhan, M.M. et al. Facet controlled polyhedral ZIF-8 MOF nanostructures for excellent NO2 gas-sensing applications. *Mater. Res. Bull.* **136**, 111133 (2021).

25. Arul, C. et al. Temperature modulated Cu-MOF based gas sensor with dual selectivity to acetone and NO2 at low operating temperatures. *Sens. Actuators B Chem.l* **329**, 129053 (2021).

26. Bai, H.N. et al. A room-temperature chemiresistive NO2 sensor based on one-step synthesized SnO2 nanospheres functionalized with Pd nanoparticles and rGO nanosheets. *Appl. Surf. Sci.* **575,** 151698 (2022).

27. Xia, Y. et al. Sulfur-Vacancy-Enriched MoS2 Nanosheets Based Heterostructures for Near-Infrared Optoelectronic NO2 Sensing. *Acs Applied Nano Materials* **3**, 665-673 (2020).

28. Huang, Y.F. et al. Ultrasensitive room temperature ppb-level NO2 gas sensors based on SnS2/rGO nanohybrids with P-N transition and optoelectronic visible light enhancement performance. *J. Mater. Chem. C* **7**, 8616-8625 (2019).

29. Yan, W.J. et al. Photo-enhanced gas sensing of SnS2 with nanoscale defects. *Rsc Advs.* **9**, 626-635 (2019).

30. Chen, R.S., Wang, J., Xia, Y. & Xiang, L. Near infrared light enhanced room-temperature NO2 gas sensing by hierarchical ZnO nanorods functionalized with PbS quantum dots. *Sens. Actuators B Chem.* **255**, 2538-2545 (2018).

31. Wang, H.T. et al. Visible light activated excellent NO2 sensing based on 2D/2D ZnO/g-C3N4 heterojunction composites. *Actuators B Chem.* **304** , 127287(2020).

32. Gu, D. et al. Visible-light activated room temperature NO2 sensing of SnS2 nanosheets based chemiresistive sensors. *Actuators B Chem.* **305**, 127455 (2020).

33. Polyakov, A.Y. et al. Gold Decoration and Photoresistive Response to Nitrogen Dioxide of WS2 Nanotubes. *Chem. Eur. J.* **24**, 18952-18962 (2018).

34. Paolucci, V., Emamjomeh, S.M., Ottaviano, L. & Cantalini, C. Near Room Temperature Light-Activated WS2-Decorated rGO as NO2 Gas Sensor. *Sensors* **19** ,2617 (2019).

35. Zhang QP, et al. Visible light-assisted room temperature gas sensing with ZnO-Ag heterostructure nanoparticles. *Sens. Actuators B Chem.* **259**, 269-281 (2018).

36. Geng, X., You, J.J., Wang, J. & Zhang, C. Visible light assisted nitrogen dioxide sensing using tungsten oxide - Graphene oxide nanocomposite sensors. *Mater. Chem. Phys.***191**, 114-120 (2017).

37. Zhang, C. et al. Room temperature responses of visible-light illuminated WO3 sensors to NO2 in sub-ppm range. *Sens. Actuators B Chem.* **181**, 395-401 (2013).

38. Giancaterini, L., Emamjomeh, S.M., De Marcellis, A., Palange, E. & Cantalini, C. in *Conference on Eurosensors, Vol. 120*, Freiberg, Germany, **2015**, pp. 791-794 (2015).

39. Li, H.Z. et al. Rationally designed titanium-based metal-organic frameworks for visible-light activated chemiresistive sensing. *J. Mater. Chem.A* **11**, 965-971 (2023).

40. Kumar, R., Jenjeti, R.N. & Sampath, S. Two-Dimensional, Few-Layer MnPS3 for Selective NO2 Gas Sensing under Ambient Conditions. *ACS Sens.* **5**, 404-411 (2020).

41. Chen, P. et al. Two-Dimensional Conjugated Metal-Organic Frameworks with Large Pore Apertures and High Surface Areas for NO2 Selective Chemiresistive Sensing. *Angew. Chem. Int. Ed.* **62**, e202306224 (2023).

42. Jiang, H. et al. Organic “receptor” fully covered few-layer organic–metal chalcogenides for high-performance chemiresistive gas sensing at room temperature. *Chem. Commun.* **56**, 5366-5369 (2020).

43. Liu, H. et al. Physically Flexible, Rapid-Response Gas Sensor Based on Colloidal Quantum Dot Solids. *Adv. Mater.* **26**, 2718-2724 (2014).

44. Geng, X. et al. Atomically dispersed Pb ionic sites in PbCdSe quantum dot gels enhance room-temperature NO2 sensing. *Nat. Commun.* **12**, 4895 (2021).

45. Wen, Y. et al. A Covalent Organic–Inorganic Hybrid Superlattice Covered with Organic Functional Groups for Highly Sensitive and Selective Gas Sensing. *Angew. Chem. Int. Ed.* **60**, 19710-19714 (2021).

46. Geng, X. et al. Photoexcited NO2 Enables Accelerated Response and Recovery Kinetics in Light-Activated NO2 Gas Sensing. *ACS Sens.* **6**, 4389-4397 (2021).
